# Supplementary material for: Burdens of Apprentices Caused by the COVID-19 Pandemic and How They Deal with Them: A Qualitative Study Using Content Analysis One-Year Post-Breakout
Source: MDPI journal article supplement (doi:10.3390/healthcare10112206), 2022-11-03
Supplement: s1 [file s1]

**Table S1: Category System that Emerged from the Data of Question 1: “What burdens do you face as a result of the pandemic?”**

**Table S1.** Category System that Emerged from the Date of Question 1: “What burdens do you face as a result of the pandemic?”

| <b>Categories</b>                      | <b><i>n</i></b> | <b>%</b>     |
|----------------------------------------|-----------------|--------------|
| <b>Restrictions and Regulations</b>    | <b>586</b>      | <b>40.64</b> |
| Mask Requirement                       | 190             | 13.18        |
| Hobbies and Free Time                  | 138             | 9.57         |
| Curfew                                 | 130             | 9.02         |
| Closed Retail and Gastronomy           | 99              | 6.87         |
| Sports                                 | 70              | 4.85         |
| Other COVID-19 Restrictions            | 55              | 3.81         |
| Testing                                | 31              | 2.15         |
| Events                                 | 27              | 1.87         |
| Constantly Changing Restrictions       | 13              | 0.90         |
| Quarantine                             | 6               | 0.42         |
| <b>Social Life</b>                     | <b>532</b>      | <b>36.89</b> |
| Limited Social Contact                 | 477             | 33.08        |
| Friends                                | 280             | 19.42        |
| Relatives of Family Members            | 62              | 4.30         |
| Limited Social Contact in General      | 181             | 12.55        |
| Family                                 | 48              | 3.33         |
| Family in General                      | 21              | 1.46         |
| Arguments and Disagreements            | 18              | 1.25         |
| Spatial Concentration                  | 13              | 0.90         |
| Social Losses                          | 43              | 2.98         |
| Break Ups/Impairments in Relationships | 14              | 0.97         |
| No Possibility to Make new Friends     | 13              | 0.90         |
| Losing Friends                         | 10              | 0.69         |
| Concerns in the Team (Work-Related)    | 8               | 0.55         |
| <b>Mental Burdens</b>                  | <b>474</b>      | <b>32.87</b> |
| Lockdown-Related                       | 188             | 13.04        |
| Loneliness / Isolation                 | 60              | 4.16         |
| Boredom                                | 40              | 2.77         |
| Monotony                               | 31              | 2.15         |
| Feeling Deprived of Freedom            | 31              | 2.15         |
| Feeling of Missing Out                 | 27              | 1.87         |
| Feeling Locked Up                      | 17              | 1.18         |
| Other Mental Burdens                   | <b>140</b>      | <b>9.71</b>  |
| Unspecified Other Mental Burdens       | 54              | 3.74         |
| Fear of COVID-19 Infection             | 31              | 2.15         |

|                                             |            |              |
|---------------------------------------------|------------|--------------|
| Fear of the Future                          | 24         | 1.66         |
| Fear of Punishment for Non-Compliance       | 18         | 1.25         |
| Mental Burdens of Others                    | 10         | 0.69         |
| Deaths                                      | 10         | 0.69         |
| News                                        | 8          | 0.55         |
| Lack of Drive / Motivation                  | 73         | 5.06         |
| Depression                                  | 62         | 4.30         |
| Stress                                      | 61         | 4.23         |
| Mental Burden in General                    | 60         | 4.16         |
| Sleep                                       | 41         | 2.84         |
| Anxiety                                     | 19         | 1.32         |
| Self-Doubt                                  | 13         | 0.90         |
| Concentration Difficulties                  | 10         | 0.69         |
| Sadness                                     | 8          | 0.55         |
| Addiction                                   | 8          | 0.55         |
| <b>Work and Education</b>                   | <b>328</b> | <b>22.75</b> |
| Distance Learning                           | 90         | 6.24         |
| Home Office                                 | 62         | 4.30         |
| Working Conditions                          | 55         | 3.81         |
| Stress at School                            | 39         | 2.70         |
| Lack of Practice                            | 35         | 2.43         |
| Stress at Work                              | 33         | 2.29         |
| Conditions at School                        | 30         | 2.08         |
| Final Apprenticeship Examination / A-Levels | 25         | 1.73         |
| No Apprenticeship Position                  | 23         | 1.60         |
| Labor Market Uncertainties                  | 9          | 0.62         |
| Overload of Tasks                           | 5          | 0.35         |
| Furlough                                    | 3          | 0.21         |
| Long Journey                                | 3          | 0.21         |
| <b>Physical Burdens</b>                     | <b>72</b>  | <b>4.99</b>  |
| Other Physical Complaints                   | 35         | 2.43         |
| Impaired Breathing                          | 27         | 1.87         |
| Headache                                    | 15         | 1.04         |
| Postponement of Medical Treatments          | 4          | 0.28         |
| Circulatory Complaints                      | 3          | 0.21         |
| No Burdens                                  | 81         | 5.62         |
| Other Burdens                               | 66         | 4.58         |
| Don't Know                                  | 13         | 0.90         |
| Not Like Before                             | 11         | 0.76         |

---

**Table S2: Category System that Emerged from the Data of Question 2: “What helps you to cope with these burdens?”**

**Table S2.** Category System that Emerged from the Date of Question 2: “What helps you to cope with these burdens?”

| <b>Categories</b>                 | <b><i>n</i></b> | <b>%</b>     |
|-----------------------------------|-----------------|--------------|
| <b>Social Contacts</b>            | <b>526</b>      | <b>36.48</b> |
| Friends                           | 290             | 20.11        |
| Staying in Touch / Communication  | 248             | 17.20        |
| Family                            | 152             | 10.54        |
| Partner                           | 85              | 5.89         |
| Coworkers and Classmates          | 37              | 2.57         |
| Teachers and Trainers             | 9               | 0.62         |
| <b>Personal Attitudes</b>         | <b>332</b>      | <b>23.02</b> |
| Thinking / Staying Positive       | 57              | 3.95         |
| Behavior Contrary to the Rules    | 38              | 2.64         |
| Hope                              | 38              | 2.64         |
| Taking Breaks                     | 34              | 2.36         |
| Relaxing                          | 30              | 2.08         |
| Acceptance                        | 29              | 2.01         |
| Behavior in Compliance with Rules | 26              | 1.80         |
| Self                              | 22              | 1.53         |
| Suppression                       | 20              | 1.39         |
| Creating Structure                | 19              | 1.32         |
| Studying                          | 19              | 1.32         |
| Problem Solving                   | 18              | 1.25         |
| Allowing Emotions                 | 8               | 0.55         |
| Motivation                        | 6               | 0.42         |
| Religion                          | 5               | 0.35         |
| <b>Leisure Activities</b>         | <b>313</b>      | <b>21.71</b> |
| Nature                            | 129             | 8.95         |
| Sports                            | 123             | 8.53         |
| Hobbies in General                | 53              | 3.68         |
| Reading                           | 19              | 1.32         |
| Being Creative                    | 16              | 1.11         |
| Cooking and Eating                | 11              | 0.76         |
| Learning Something New            | 10              | 0.69         |
| Meditation                        | 4               | 0.28         |
| <b>Distraction</b>                | <b>217</b>      | <b>15.05</b> |
| Gaming                            | 68              | 4.72         |
| Music                             | 68              | 4.72         |
| TV                                | 50              | 3.47         |
| Distraction in General            | 44              | 3.05         |

|                                      |            |             |
|--------------------------------------|------------|-------------|
| Mobile Phone, Social Media, Internet | 27         | 1.87        |
| <b>Escapism</b>                      | <b>125</b> | <b>8.67</b> |
| Sleeping                             | 39         | 2.70        |
| Work                                 | 32         | 2.22        |
| Alcohol                              | 15         | 1.04        |
| Drugs                                | 15         | 1.04        |
| Cigarettes                           | 14         | 0.97        |
| Escaping the Situation               | 10         | 0.69        |
| Unhealthy Eating                     | 8          | 0.55        |
| Self-Harming                         | 1          | 0.07        |
| <b>Professional Help</b>             | <b>38</b>  | <b>2.64</b> |
| Psychotherapists                     | 20         | 1.39        |
| Medication                           | 14         | 0.97        |
| Psychologists                        | 6          | 0.42        |
| AMS / Other Labor Market Measures    | 2          | 0.14        |
| Nothing                              | 118        | 8.18        |
| Other Resources                      | 63         | 4.37        |
| No Help Needed                       | 42         | 2.91        |
| Don't know                           | 31         | 2.15        |
| Pets                                 | 25         | 1.73        |
| Wishful Thinking                     | 15         | 1.04        |

---
